# Supplementary material for: Imidazolium triflimide-based Brønsted acidic ionic liquid as organocatalyst to trigger the cationic ring-opening polymerization of cyclotrisiloxanes
Source: Royal Society of Chemistry journal article supplement (doi:10.1039/d3py00648d), 2023-01-01
Supplement: d3py00648d1.pdf [file d3py00648d1.pdf]

## Supporting Information

# Imidazolium Triflimide-based Bronsted acidic ionic liquid as organocatalyst to trigger the cationic ring-opening polymerization of cyclotrisiloxanes

Winnie Nzahou Ottou,<sup>a</sup> Aurélie Boulègue Mondière,<sup>b</sup> Hervé Parisot,<sup>b</sup> Delphine Blanc,<sup>b</sup> Daniel Portinha\*<sup>a</sup> and Etienne Fleury \*<sup>a</sup>

<sup>a</sup>. Univ Lyon, CNRS, Université Claude Bernard Lyon 1, INSA Lyon, Université Jean Monnet, UMR 5223, Ingénierie des Matériaux Polymères F-69621 Villeurbanne Cedex, France

<sup>b</sup>. Elkem Silicones, R&D Chemistry, R&I Centre "ATRiON", 9 rue Specia, F-69190 Saint-Fons, France

## Content

**Additional SEC chromatograms and <sup>29</sup>Si NMR spectra**

## ■ Screening of 6 commercial ionic liquids as initiators for ROP of D<sub>3</sub>

**Table S1. Ring-opening polymerization (ROP) of D<sub>3</sub> initiated by selected ionic liquids in bulk at 90°C.**

| Entry | Ionic liquid (IL)                       | [D <sub>3</sub> ] <sub>0</sub> /[IL] <sub>0</sub> | Time  | SEC composition <sup>a</sup><br>(% wt) |                                                  |      | M <sub>n</sub> (kg.mol <sup>-1</sup> ) (Đ) <sup>a</sup> |
|-------|-----------------------------------------|---------------------------------------------------|-------|----------------------------------------|--------------------------------------------------|------|---------------------------------------------------------|
|       |                                         |                                                   |       | D <sub>3</sub>                         | D <sub>4</sub> + D <sub>5</sub> + D <sub>6</sub> | PDMS |                                                         |
| S1    | [BMIM]HSO <sub>4</sub>                  | 250/1                                             | 5h    | 100                                    | 0                                                | 0    | No polymer <sup>b</sup>                                 |
| S2    | [BMIM]HSO <sub>4</sub>                  | 50/1                                              | 5h    | 96.1                                   | 3.9                                              | 0    | No polymer <sup>b</sup>                                 |
| S3    | [BMIMSO <sub>3</sub> H]HSO <sub>4</sub> | 250/1                                             | 5h    | 100                                    | 0                                                | 0    | No polymer <sup>b</sup>                                 |
| S4    | [BMIMSO <sub>3</sub> H]HSO <sub>4</sub> | 50/1                                              | 5h    | 97.5                                   | 2.5                                              | 0    | No polymer <sup>b</sup>                                 |
| S5    | [BMIM]OTf                               | 250/1                                             | 5h    | 100                                    | 0                                                | 0    | No polymer <sup>b</sup>                                 |
| S6    | [BMIM]OTf                               | 50/1                                              | 5h    | 99.3                                   | 0.7                                              | 0    | No polymer <sup>b</sup>                                 |
| S7    | [BMIMSO <sub>3</sub> H]OTf              | 250/1                                             | 15min | 0.1                                    | 13.0                                             | 86.9 | 317 (1.4)                                               |
| S8    | [BMIM]NTf <sub>2</sub>                  | 250/1                                             | 5h    | 100                                    | 0                                                | 0    | No polymer <sup>b</sup>                                 |
| S9    | [BMIM]NTf <sub>2</sub>                  | 50/1                                              | 5h    | 100                                    | 0                                                | 0    | No polymer <sup>b</sup>                                 |
| S10   | [BMIMSO <sub>3</sub> H]NTf <sub>2</sub> | 250/1                                             | 5min  | 0.1                                    | 9.2                                              | 90.7 | 271 (1.4)                                               |

- a) SEC conducted in toluene using polystyrene (PS) for calibration.  
b) As confirmed by FTIR analysis

**Table S2. Polymerization of D<sub>3</sub> induced by [BMIMSO<sub>3</sub>H]OTf as BAIL in bulk at 90°C.**

| Entry | [D <sub>3</sub> ] <sub>0</sub> /[IL] <sub>0</sub> | Time | NMR composition <sup>a</sup> (%) |                                                  |      | M <sub>n</sub> (kg.mol <sup>-1</sup> ) |                      |
|-------|---------------------------------------------------|------|----------------------------------|--------------------------------------------------|------|----------------------------------------|----------------------|
|       |                                                   |      | D <sub>3</sub>                   | D <sub>4</sub> + D <sub>5</sub> + D <sub>6</sub> | PDMS | Theo <sup>b</sup>                      | SEC (Đ) <sup>c</sup> |
| S11   | 250/1                                             | 2h   | 7.0                              | 28.7                                             | 71.3 | 45                                     | 288 (2.2)            |
| S12   | 1,000/1                                           | 2h   | 8.7                              | 22.7                                             | 77.3 | 174                                    | 249 (2.4)            |
| S13   | 2,500/1                                           | 2h   | 9.4                              | 15                                               | 85.0 | 458                                    | 277 (2.1)            |

- a) Determined by <sup>29</sup>Si NMR in CDCl<sub>3</sub> at 298  

$$M_n^{\text{Theo}} = \frac{[D_3]_0}{[BAIL]_0} * 3 * \text{conv} * 74.1$$
b) Theoretical molar masse, where [D<sub>3</sub>]<sub>0</sub> and [BAIL]<sub>0</sub> are the initial molar content of D<sub>3</sub> and BAIL. conv is the conversion of D<sub>3</sub>: conv = 100 - %wt<sup>SEC</sup>D<sub>3</sub>  
c) SEC conducted in toluene using polystyrene (PS) for calibration

**Table S3. Polymerization of D<sub>3</sub> induced by [BMIMSO<sub>3</sub>H]NTf<sub>2</sub> as BAIL in bulk at 90°C.**

| Entry | [D <sub>3</sub> ] <sub>0</sub> /[IL] <sub>0</sub> | Time  | NMR composition <sup>a</sup> (%) |                                                  |      | M <sub>n</sub> (kg.mol <sup>-1</sup> ) |                      |
|-------|---------------------------------------------------|-------|----------------------------------|--------------------------------------------------|------|----------------------------------------|----------------------|
|       |                                                   |       | D <sub>3</sub>                   | D <sub>4</sub> + D <sub>5</sub> + D <sub>6</sub> | PDMS | Theo <sup>b</sup>                      | SEC (Đ) <sup>c</sup> |
| S14   | 250/1                                             | 10min | 0                                | 13                                               | 87.0 | 47                                     | 274 (2.3)            |
| S15   | 1,100/1                                           | 10min | 0                                | 9.1                                              | 90.9 | 247                                    | 257 (2.2)            |
| S16   | 2,000/1                                           | 10min | 0                                | 8.0                                              | 92.0 | 405                                    | 218 (2.7)            |
| S17   | 2,800/1                                           | 15min | 0                                | 8.1                                              | 91.9 | 619                                    | 160 (2.3)            |

- a) Determined by <sup>29</sup>Si NMR in CDCl<sub>3</sub> at 298  

$$M_n^{\text{Theo}} = \frac{[D_3]_0}{[BAIL]_0} * 3 * \text{conv} * 74.1$$
b) Theoretical molar masse, where [D<sub>3</sub>]<sub>0</sub> and [BAIL]<sub>0</sub> are the initial molar content of D<sub>3</sub> and BAIL. conv is the conversion of D<sub>3</sub>: conv = 100 - %wt<sup>SEC</sup>D<sub>3</sub>  
c) SEC conducted in toluene using polystyrene (PS) for calibration

▪ ([BMIMSO<sub>3</sub>H]NTf<sub>2</sub>) catalyzed ROP of D<sub>3</sub>

■ Selection of chain regulators

○ Chain regulators = YOH

**BnOH**

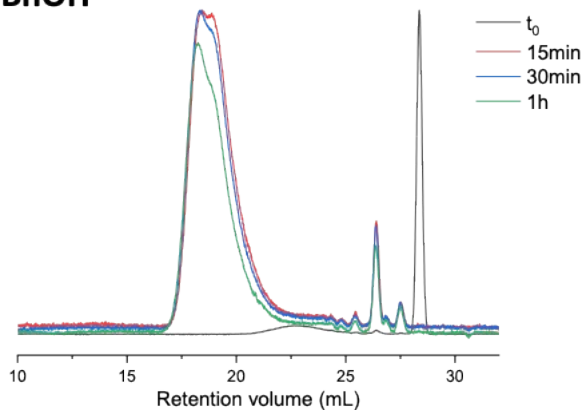

**VinBuOH**

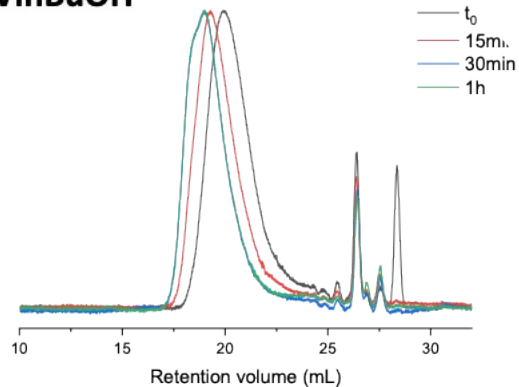

Figure S1. SEC traces (RI detector) of [BMIMSO<sub>3</sub>H]NTf<sub>2</sub>-catalyzed polymerization of D<sub>3</sub> in bulk at 90°C using alcohols as chain regulators (YOH) (Table 1, entries 2-3).

**Me<sub>3</sub>SiOH**

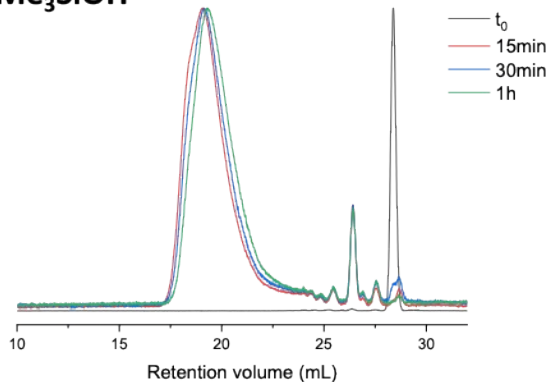

**Et<sub>3</sub>SiOH**

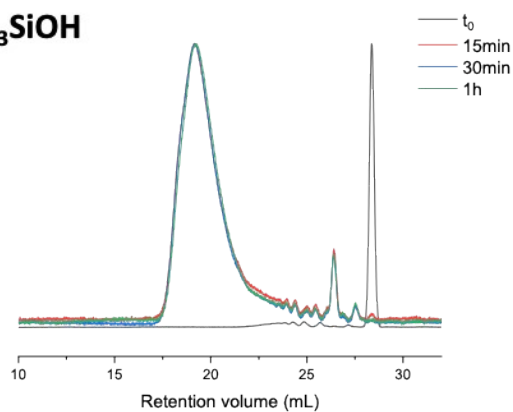

Figure S2. SEC traces (RI detector) of [BMIMSO<sub>3</sub>H]NTf<sub>2</sub>-catalyzed polymerization of D<sub>3</sub> in bulk at 90°C using silanols as chain regulators (YOH) (Table 1, entries 4-5).

○ Chain regulators =  $M_x$

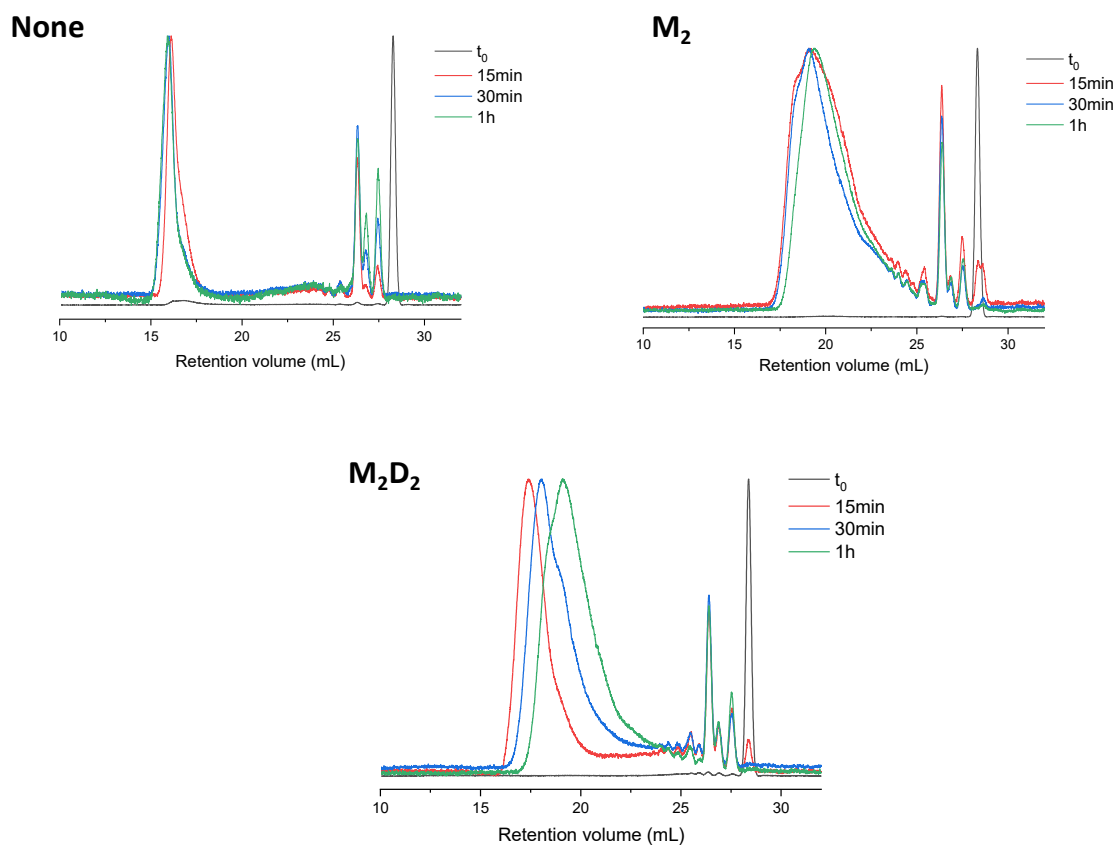

Figure S3. SEC traces (RI detector) of  $[BMIMSO_3H]NTf_2$ -catalyzed polymerization of  $D_3$  in bulk at  $90^\circ C$  using disiloxanes as chain regulators ( $M_x$ ) (Table 2, entries 7-8)

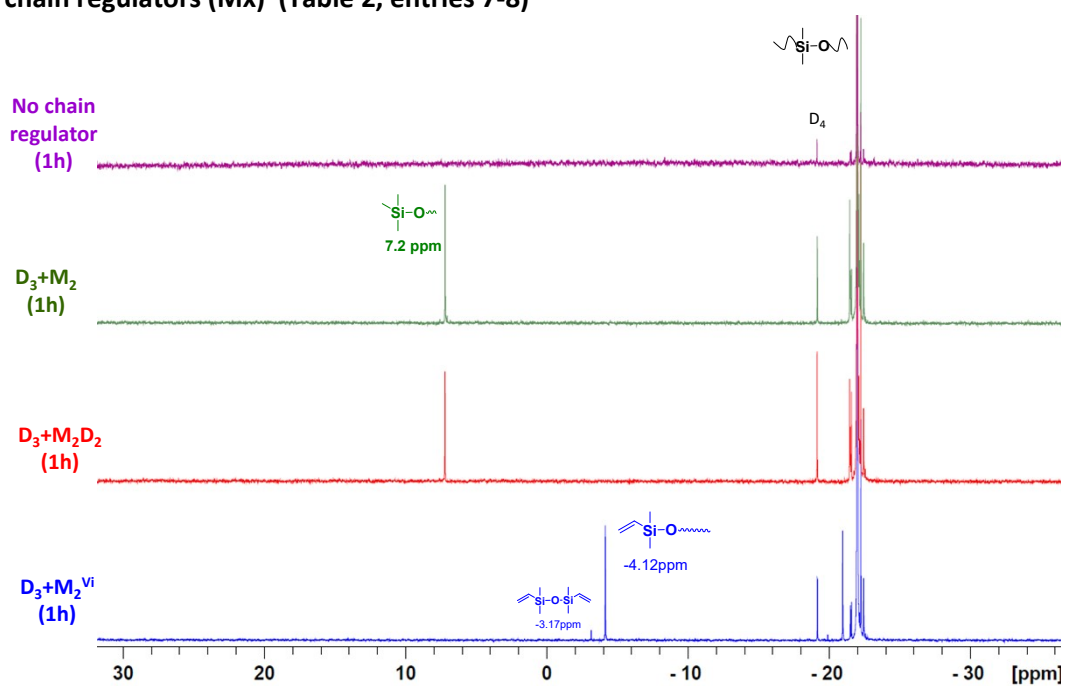

Figure S4.  $^{29}Si$  NMR (in  $CDCl_3$ ) of reaction mixture of  $[BMIMSO_3H]NTf_2$ -catalyzed polymerization of  $D_3$  in bulk at  $90^\circ C$  using disiloxanes as chain regulators ( $M_x$ ) (see legend) (Table 2)

▪ Influence of  $[D_3]_0/[M_2]_0$  initial ratio

Table S4. Polymerization of  $D_3$  at 90°C in bulk using different  $[D_3]_0/[M_2]_0$  ratios and  $[D_3]_0/[BMIMSO_3H]NTf_2]_0 = 1,400$ .

| Entry | Experiment | $[D_3]_0/[M_2]_0$ | Time  | SEC composition <sup>a</sup> (%) |                   |      | $M_n$ (kg.mol <sup>-1</sup> ) |                                |
|-------|------------|-------------------|-------|----------------------------------|-------------------|------|-------------------------------|--------------------------------|
|       |            |                   |       | $M_2 + D_3$                      | $D_4 + D_5 + D_6$ | PDMS | Theo <sup>b</sup>             | SEC ( $\bar{M}$ ) <sup>a</sup> |
| S18   | WR-146     | 8                 | 0     | 100                              | 0                 | 0    | -                             | -                              |
|       |            |                   | 5min  | 10.6                             | 11.0              | 78.4 | -                             | 3.0 (2.2)                      |
|       |            |                   | 10min | 5.3                              | 9.7               | 85.0 | -                             | 3.9 (2.7)                      |
|       |            |                   | 15min | 3.4                              | 9.2               | 87.4 | -                             | 4.3 (2.7)                      |
|       |            |                   | 25min | 2.1                              | 9.3               | 88.6 | -                             | 4.4 (2.6)                      |
|       |            |                   | 35min | 1.8                              | 9.4               | 88.8 | -                             | 4.3 (2.5)                      |
|       |            |                   | 45min | 1.6                              | 9.5               | 88.9 | -                             | 4.2 (2.4)                      |
|       |            |                   | 1h    | 1.4                              | 8.7               | 89.9 | 1.9                           | 4.0 (2.3)                      |
| S19   | WR-180     | 21                | 0     | 100                              | 0                 | 0    | -                             | -                              |
|       |            |                   | 4min  | 10.9                             | 13.2              | 75.9 | -                             | 4.3 (2.7)                      |
|       |            |                   | 8min  | 3.2                              | 8.1               | 88.7 | -                             | 5.8 (3.1)                      |
|       |            |                   | 15min | 0.5                              | 7.2               | 92.3 | -                             | 6.8 (3.7)                      |
|       |            |                   | 25min | 0.4                              | 7.5               | 92.3 | -                             | 6.8 (3.4)                      |
|       |            |                   | 35min | 0.1                              | 7.3               | 92.4 | -                             | 6.5 (3.2)                      |
|       |            |                   | 45min | 0.2                              | 7.9               | 92.0 | -                             | 6.1 (3.1)                      |
|       |            |                   | 1h    | 0.2                              | 5.8               | 94.0 | 5.0                           | 6.8 (2.7)                      |
| S20   | WR-181     | 48                | 0     | 100                              | 0                 | 0    | -                             | -                              |
|       |            |                   | 4min  | 8.5                              | 11.1              | 80.4 | -                             | 7.1 (3.6)                      |
|       |            |                   | 8min  | 0.8                              | 7.7               | 91.5 | -                             | 9.4 (4.0)                      |
|       |            |                   | 15min | 0.8                              | 6.3               | 92.9 | -                             | 10.5 (4.7)                     |
|       |            |                   | 25min | 1.8                              | 8.0               | 90.2 | -                             | 10.3 (3.9)                     |
|       |            |                   | 35min | 1.9                              | 6.2               | 91.9 | -                             | 10.2 (3.7)                     |
|       |            |                   | 45min | 1.8                              | 6.7               | 91.5 | -                             | 9.9 (3.6)                      |
|       |            |                   | 1h    | 1.1                              | 7.0               | 91.9 | 10.8                          | 9.6 (3.4)                      |
| S21   | WR-182     | 83                | 0     | 100                              |                   | 0    | -                             | -                              |
|       |            |                   | 4min  | 19.0                             | 10.6              | 70.4 | -                             | 9.0 (3.8)                      |
|       |            |                   | 8min  | 1.6                              | 8.9               | 89.5 | -                             | 11.4 (4.5)                     |
|       |            |                   | 15min | 0.4                              | 8.2               | 91.4 | -                             | 12.0 (5.2)                     |
|       |            |                   | 25min | 0.3                              | 7.1               | 92.6 | -                             | 12.5 (4.8)                     |
|       |            |                   | 35min | 0.6                              | 7.1               | 92.3 | -                             | 11.3 (4.7)                     |
|       |            |                   | 45min | 0.5                              | 6.5               | 93.0 | -                             | 11.4 (4.4)                     |
|       |            |                   | 1h    | 0.2                              | 6.3               | 93.5 | 19.1                          | 11.5 (4.0)                     |

a) Determined by SEC conducted in toluene using polystyrene (PS) for calibration

$$M_n^{\text{Theo}} = \frac{[D_3]_0}{[BAIL]_0} * 3 * \text{conv} * 74.1$$

b) Theoretical molar masse , where  $[D_3]_0$  and  $[BAIL]_0$  are the initial molar content of  $D_3$  and BAIL. conv is the conversion of  $D_3$ :  $\text{conv} = 100 - \%wt^{\text{SEC}}D_3$

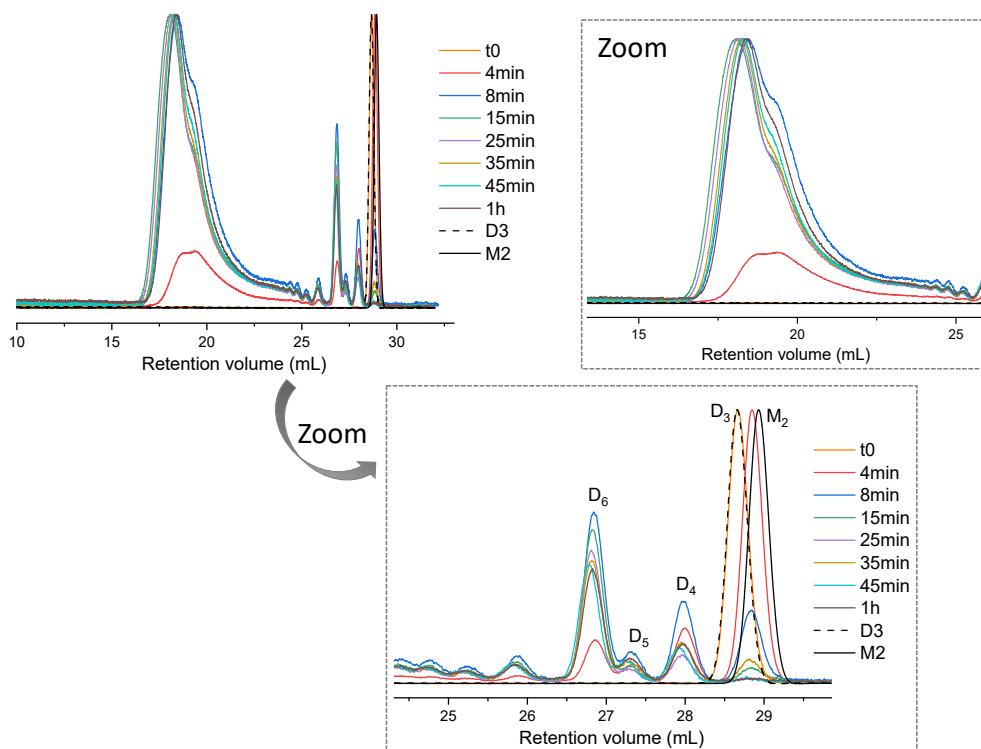

Figure S5. Example of SEC traces (RI detector) of  $[BMIMSO_3H]NTf_2$ -catalyzed polymerization of  $D_3$  in bulk at  $90^\circ C$  using  $[D_3]_0/[M_2]_0/[BAIL]_0 = 21/1/0.01$  (Table S4, entry 9).

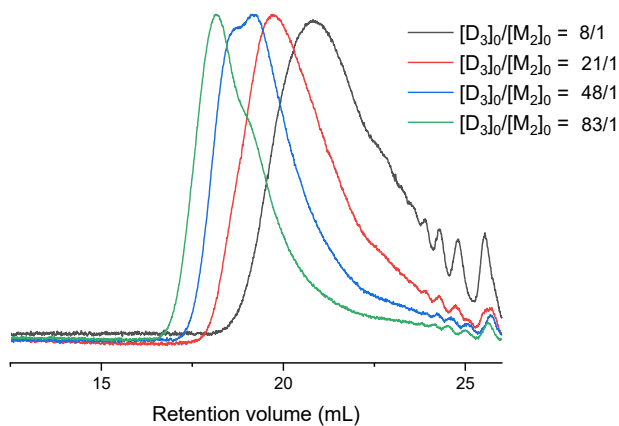

Figure S6. SEC traces (RI) of  $[BMIMSO_3H]NTf_2$ -catalyzed polymerization of  $D_3$  in bulk at  $90^\circ C$  with various  $[D_3]_0/[M_2]_0$  ratios. (Table 3, entries 9-12).

■ Polymerization of functionalized cyclosiloxanes  $D_n^F$

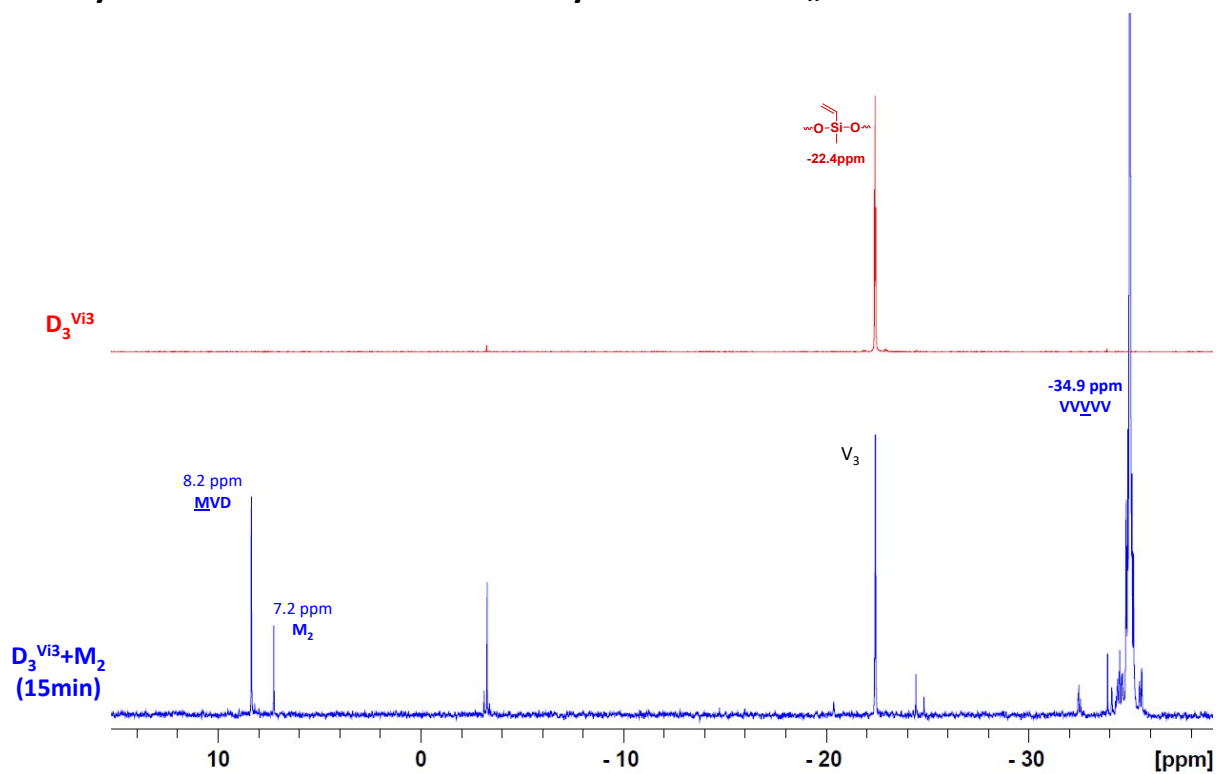

Figure S7.  $^{29}\text{Si}$  NMR spectra (in  $\text{CDCl}_3$ ) of  $D_3^{\text{Vi}3}$  and  $[\text{BMIMSO}_3\text{H}]\text{NTf}_2$ -catalyzed copolymerization of  $D_3^{\text{Vi}3}$  in bulk at  $90^\circ\text{C}$  using  $[\text{D}_3^{\text{Vi}3}]_0/[\text{M}_2]_0/[\text{BAIL}]_0 = 21/1/0.01$  (Table 4, entry 13).

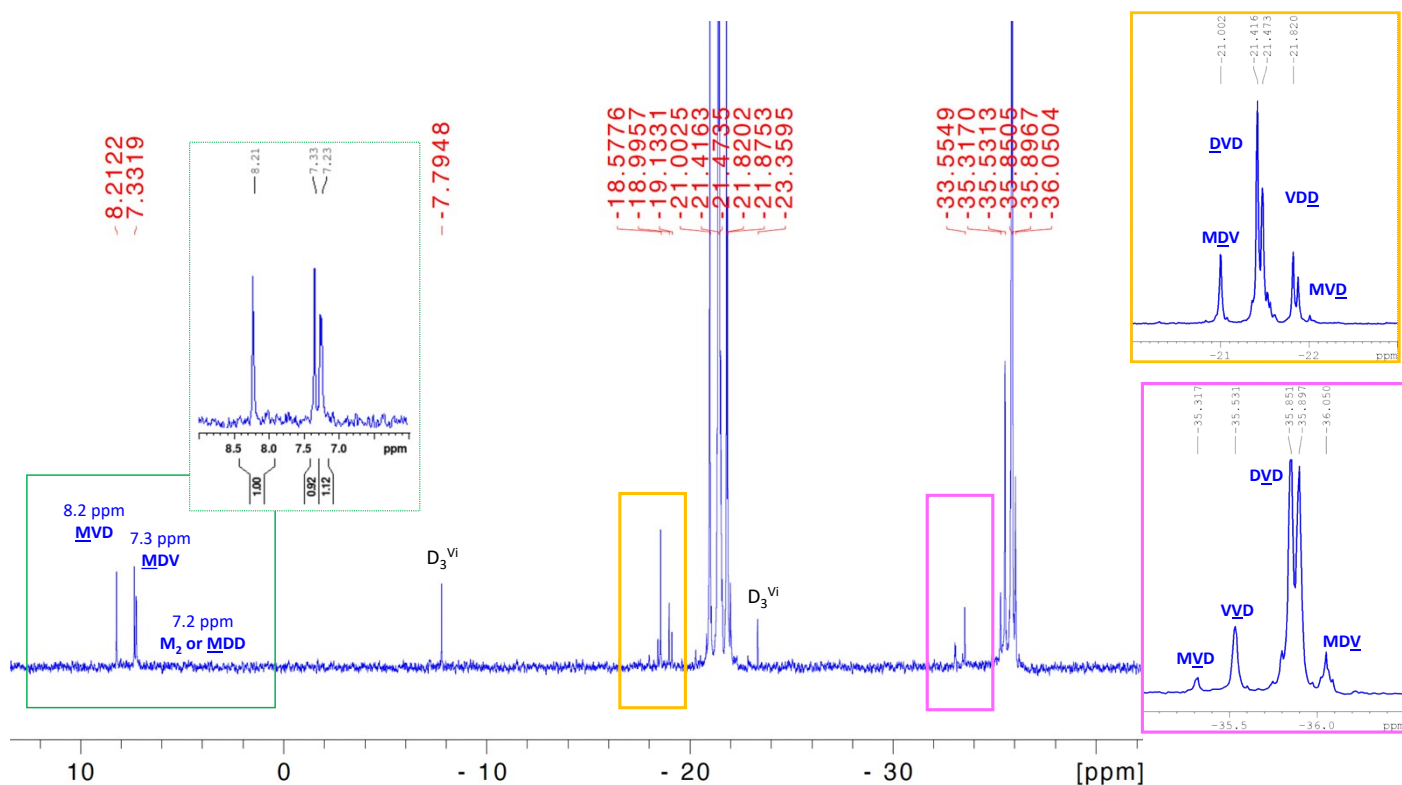

Figure S8.  $^{29}\text{Si}$  NMR spectra (in  $\text{CDCl}_3$ ) of  $[\text{BMIMSO}_3\text{H}]\text{NTf}_2$ -catalyzed copolymerization of  $D_3^{\text{Vi}}$  in bulk at  $90^\circ\text{C}$  using  $[\text{D}_3^{\text{Vi}3}]_0/[\text{M}_2]_0/[\text{BAIL}]_0 = 21/1/0.01$  ( $t = 1\text{h}$ ) (Table 4, entry 15)

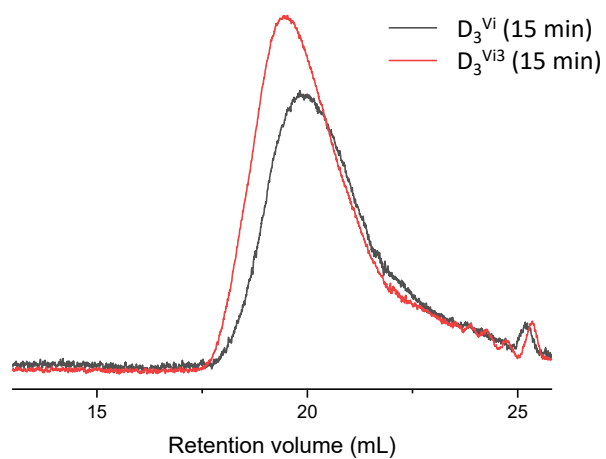

Figure S9. SEC traces (RI detector) of polymers synthesized from [BMIMSO<sub>3</sub>H]NTf<sub>2</sub>-catalyzed polymerization of D<sub>n</sub><sup>F</sup> in bulk at 90°C using M<sub>2</sub> as chain regulator (Table 4, entries 13-14).

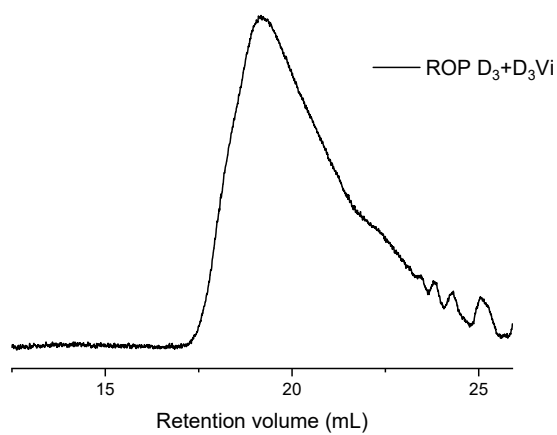

Figure S10. SEC-RI traces of polymer obtained after copolymerization of D<sub>3</sub> with D<sub>3</sub>Vi (Table 4, entry 16)



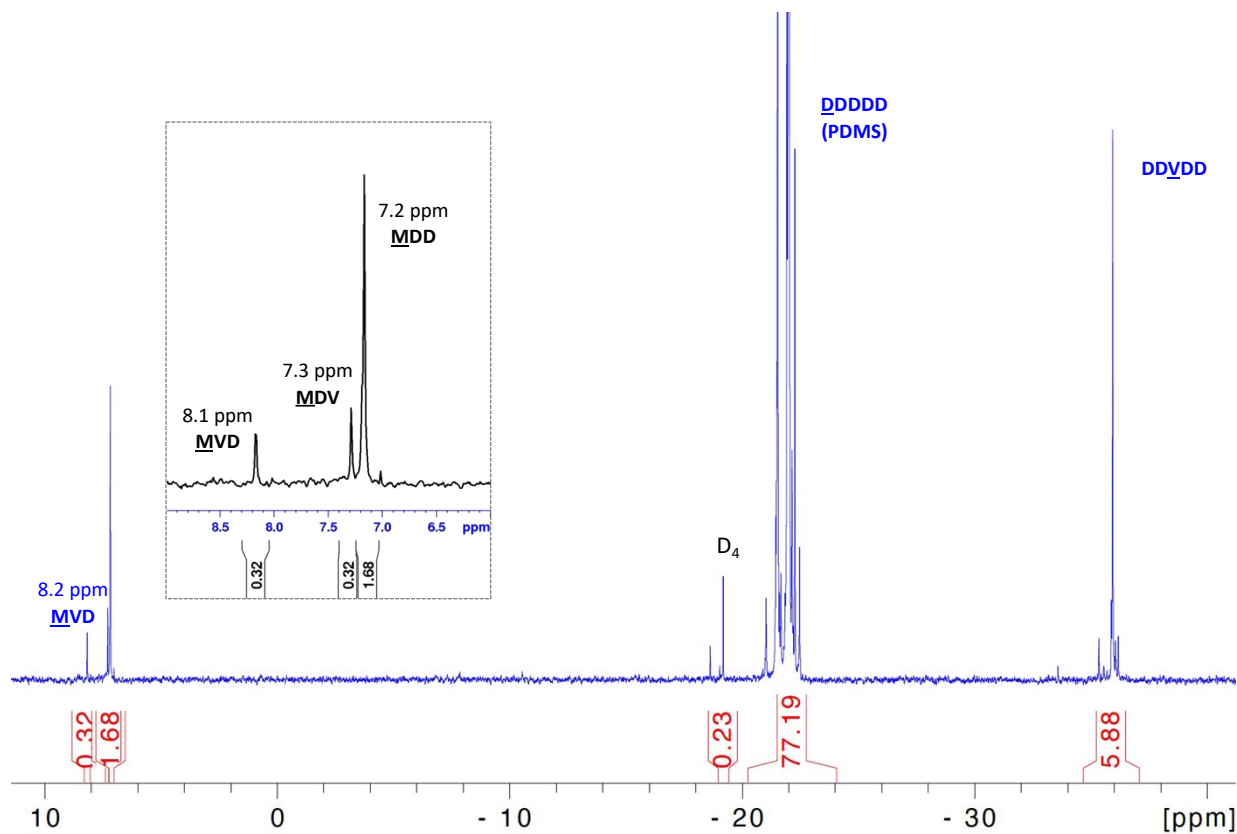

Figure S11.  $^{29}\text{Si}$  NMR (in  $\text{CDCl}_3$ ) of  $[\text{BMIMSO}_3\text{H}]\text{NTf}_2$ -catalyzed copolymerization of  $\text{D}_3/\text{D}_3^{\text{Vi}}$  (80/20) in bulk at  $90^\circ\text{C}$  using  $[\text{D}_3+\text{D}_3^{\text{Vi}3}]_0/[\text{M}_2]_0/[\text{BAIL}]_0 = 20/1/0.01$  ( $t = 1\text{h}$ ) (Table 4, entry 15).

Table S5. Microstructure of copolymer obtained by  $[\text{BMIMSO}_3\text{H}]\text{NTf}_2$ -catalyzed copolymerization of  $\text{D}_3/\text{D}_3^{\text{Vi}}$  (80/20) in bulk at  $90^\circ\text{C}$  using  $[\text{D}_3+\text{D}_3^{\text{Vi}3}]_0/[\text{M}_2]_0/[\text{BAIL}]_0 = 20/1/0.01$  ( $t = 1\text{h}$ )

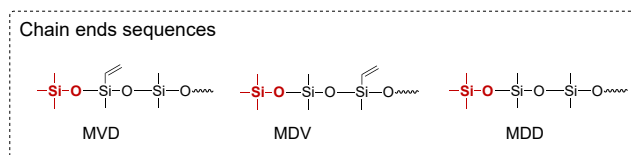

|                                       | D units                          |                                        |                                        |                                        |                                        |                                        | V units                          |                                        |                                        |                                        |                                        |
|---------------------------------------|----------------------------------|----------------------------------------|----------------------------------------|----------------------------------------|----------------------------------------|----------------------------------------|----------------------------------|----------------------------------------|----------------------------------------|----------------------------------------|----------------------------------------|
|                                       | Chain-ends (%)                   |                                        |                                        | Triads (%)                             |                                        |                                        | Chain-ends (%)                   |                                        | Triads (%)                             |                                        |                                        |
|                                       | $\underline{\text{D}}\text{-OH}$ | $\text{M}\underline{\text{D}}\text{V}$ | $\text{M}\underline{\text{D}}\text{D}$ | $\text{V}\underline{\text{D}}\text{V}$ | $\text{D}\underline{\text{D}}\text{V}$ | $\text{D}\underline{\text{D}}\text{D}$ | $\underline{\text{V}}\text{-OH}$ | $\text{M}\underline{\text{V}}\text{D}$ | $\text{V}\underline{\text{V}}\text{V}$ | $\text{V}\underline{\text{V}}\text{D}$ | $\text{D}\underline{\text{V}}\text{D}$ |
| $\text{D}_3 + \text{D}_3^{\text{Vi}}$ | 0                                | 13.9                                   | 72.3                                   | 0.7                                    | 14.7                                   | 78.2                                   | 0                                | 13.8                                   | 0                                      | 0.3                                    | 6.1                                    |

■ Discussion on polymerization mechanism  
Influence of catalyst structure =>  
Polymerization mechanism

Table S6: Polymerization of D<sub>3</sub> using various catalytic systems in bulk at 90°C.

| Entry | Catalyst                                      | [D <sub>n</sub> ] <sub>0</sub> /[M <sub>2</sub> ] <sub>0</sub> /catalyst | Time  | SEC composition <sup>b</sup> (% wt) |                                                  |      | M <sub>n</sub> (kg.mol <sup>-1</sup> ) |                      |
|-------|-----------------------------------------------|--------------------------------------------------------------------------|-------|-------------------------------------|--------------------------------------------------|------|----------------------------------------|----------------------|
|       |                                               |                                                                          |       | D <sub>3</sub>                      | D <sub>4</sub> + D <sub>5</sub> + D <sub>6</sub> | PDMS | Theo <sup>a</sup>                      | SEC (Đ) <sup>b</sup> |
| S22   | [BMIM]NTf <sub>2</sub>                        | 21/1/0.02                                                                | 15min | 100                                 | 0                                                | 0    | No polymer <sup>c</sup>                |                      |
|       |                                               |                                                                          | 4h    | 100                                 | 0                                                | 0    | No polymer <sup>c</sup>                |                      |
| S23   | C5-SO <sub>3</sub> H                          | 21/1/0.03                                                                | 15min | 0.32                                | 36.9                                             | 62.7 | 4.9                                    | 4.1 (2.3)            |
|       |                                               |                                                                          | 1h    | 0.13                                | 38.4                                             | 61.5 | 4.9                                    | 3.5 (2.8)            |
|       |                                               |                                                                          | 2h    | 0.38                                | 38.2                                             | 61.4 | 4.9                                    | 4.6 (2.4)            |
|       |                                               |                                                                          | 4h    | 0.40                                | 35.9                                             | 63.7 | 4.9                                    | 11.9 (1.7)           |
| S24   | [BMIM]NTf <sub>2</sub> + C5-SO <sub>3</sub> H | 21/1/0.02/0.03                                                           | 15min | 0.28                                | 34.4                                             | 65.3 | 4.9                                    | 4.4 (2.3)            |
|       |                                               |                                                                          | 1h    | 0.27                                | 34.0                                             | 65.7 | 4.9                                    | 4.8 (2.4)            |
|       |                                               |                                                                          | 2h    | 0.24                                | 34.5                                             | 65.2 | 4.9                                    | 4.7 (2.4)            |
|       |                                               |                                                                          | 4h    | 0.11                                | 32.7                                             | 67.2 | 4.9                                    | 4.7 (2.7)            |

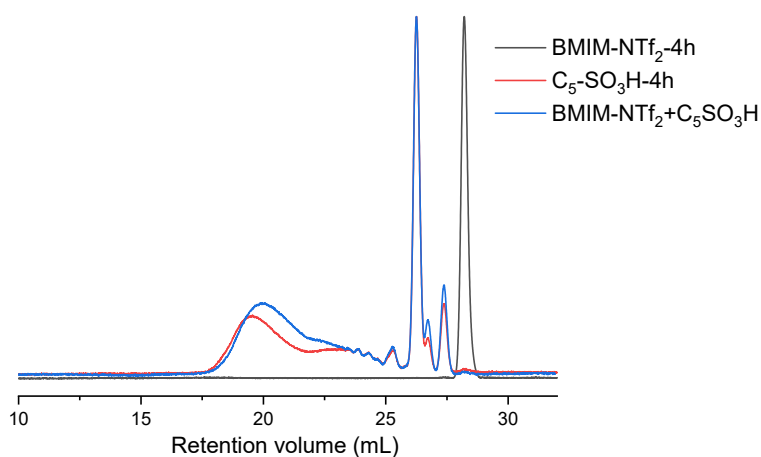

Figure S12. SEC traces (RI detector) of reaction mixture of polymerization of D<sub>3</sub> using various catalytic systems in bulk at 90°C using [D<sub>3</sub>]<sub>0</sub>/[M<sub>2</sub>]<sub>0</sub>/catalyst = 21/1/0.003 (Table S6, entries 22-24).
